# Supplementary material
Source: publisher figshare collection journal article supplement (https://frontiersin.figshare.com/ndownloader/files/33949022)
Supplement: Supplementary file [file 33949022]

## *Supplementary Material*

### **Mechanochemical Strategies for the Preparation of SiO<sub>2</sub> – Supported AgAu Nanoalloy Catalysts**

**Rafael T. P. da Silva<sup>1</sup>, Susana I. Córdoba de Torresi<sup>1</sup>, Paulo F. M. de Oliveira<sup>1\*</sup>**

<sup>1</sup>Institute of Chemistry, University of São Paulo - Brazil

**\* Correspondence:**

Paulo F. M. de Oliveira  
paulofmo@usp.br

|                                                                                                              |    |
|--------------------------------------------------------------------------------------------------------------|----|
| Catalytic Reduction of 2-Nitroaniline .....                                                                  | S2 |
| XPS Data Acquisition and Analysis .....                                                                      | S2 |
| Supplementary Figure S1 – Particle size distribution of the the metallic nanoparticles .....                 | S3 |
| Supplementary Figure S2 – HAADF-STEM and STEM-EDX characterization of the bimetallic materials. ....         | S4 |
| Supplementary Table S1 - ICP-OES analysis .....                                                              | S4 |
| Supplementary Table S2 - Reaction yield for one-hour milling.....                                            | S5 |
| Supplementary Figure S3 - XPS spectra of the mechanochemically prepared samples. ....                        | S6 |
| Supplementary Table S3 – XPS elemental analysis.....                                                         | S7 |
| Supplementary Figure S4 – Catalytic reduction of 2-NA to o-PDA.....                                          | S8 |
| Supplementary Figure S5 – Band shift in the range of 280 nm throughout the catalytic reduction of 2-NA ..... | S9 |

## Catalytic Reduction of 2-Nitroaniline

A 1 mg·mL<sup>-1</sup> aqueous stock solution of each catalyst was prepared. In a cuvette, 2.8 mL of water, 120 µL of 2-NA (6.25 mM), 130 µL of NaBH<sub>4</sub> (2 mM) and, at last, the volume correspondent to 1.6 % (m/m) of metal/2-NA of each catalyst was added. The spectra were collected every 80 seconds. The determination of the reaction rate constant followed the pseudo first-order,

$$A = A_0 e^{-\frac{k}{t}} \quad (S1)$$

in which  $A = A_{412} - A_{500}$ ,  $A_0$  = initial absorbance at 412 nm,  $k$  is the reaction rate constant and  $t$  is time. Each reaction was repeated three times. Between catalytic runs, the cuvette was washed with aqua regia and several times with water to eliminate any deposition of metals.

The conversion (%) was calculated by:

$$Conversion (\%) = \frac{A_0 - A}{A_0} \times 100 \quad (S2)$$

Considering Equation S1 and a pseudo-first order reaction, the linearization of the conversion curves followed:

$$\ln\left(\frac{C}{C_0}\right) = \ln\left(\frac{A}{A_0}\right) = -kt \quad (S3)$$

## XPS Data Acquisition and Analysis

XPS spectra were collected using Mg K $\alpha$  line as a source of ionization ( $h\nu = 1256.6$  eV) and the pass energy was adjusted to 15 eV. The inelastic scattering of XPS of Ag 3d and Au 4f were subtracted using Shirley's method. Composition of the surface (<5 nm) was determined by the relative proportional areas of the peaks corrected by the Scofield atomic sensitivity factor with a precision of  $\pm 5\%$ . Binding energy were corrected using the hydrocarbon components (C-H) set at 284.9 eV. Spectra were deconvoluted using a Voigtian function with a convolution of Gaussian (70%) and Lorentzian (30%) functions. FWHM varied between 1.2 and 2.1 eV and the peak positions were determined with a precision of  $\pm 0.1$  eV.

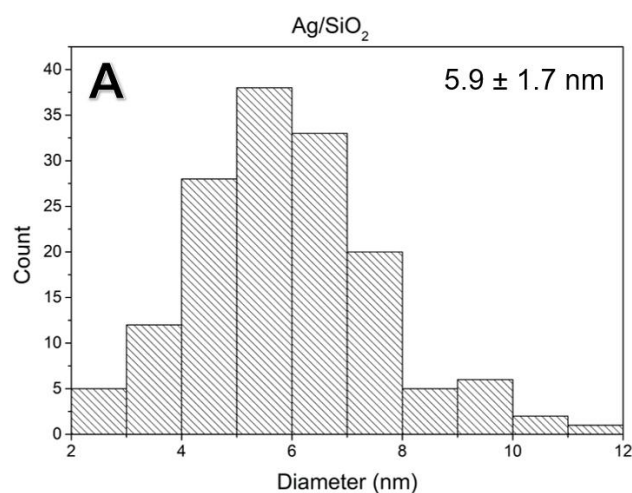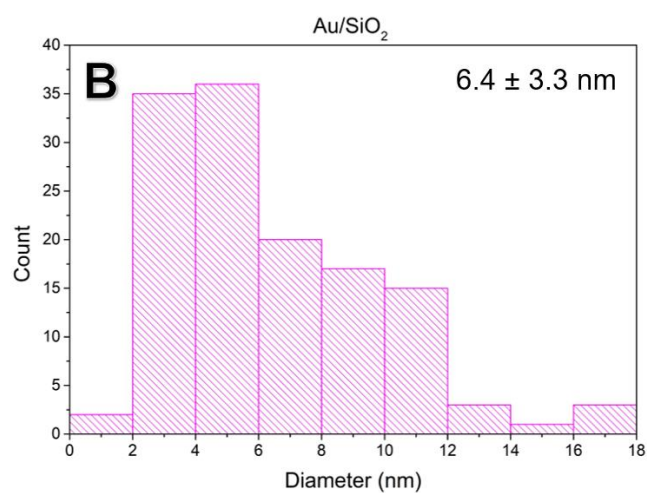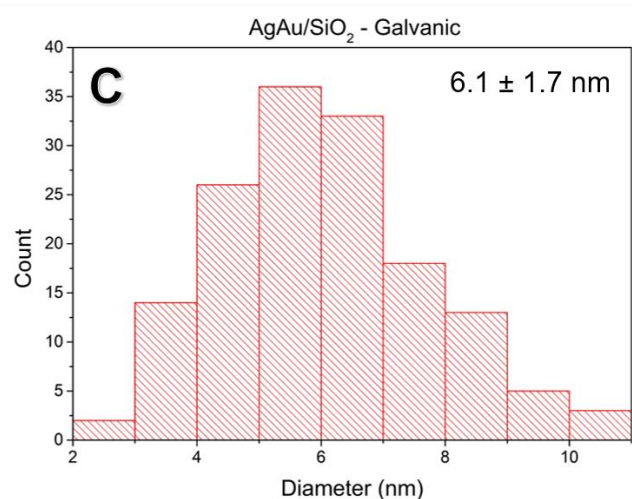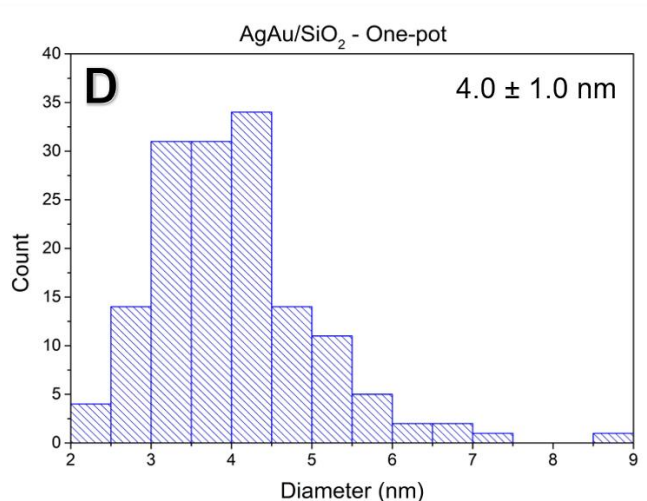

**Supplementary Figure S1** – Particle size distribution of the the metallic nanoparticles on the synthesized materials. Ag/SiO<sub>2</sub> (**A**), Au/SiO<sub>2</sub> (**B**), AgAu/SiO<sub>2</sub> galvanic (**C**), AgAu/SiO<sub>2</sub> one-pot (**D**). For particle size distribution at least 150 individual particles were considered.

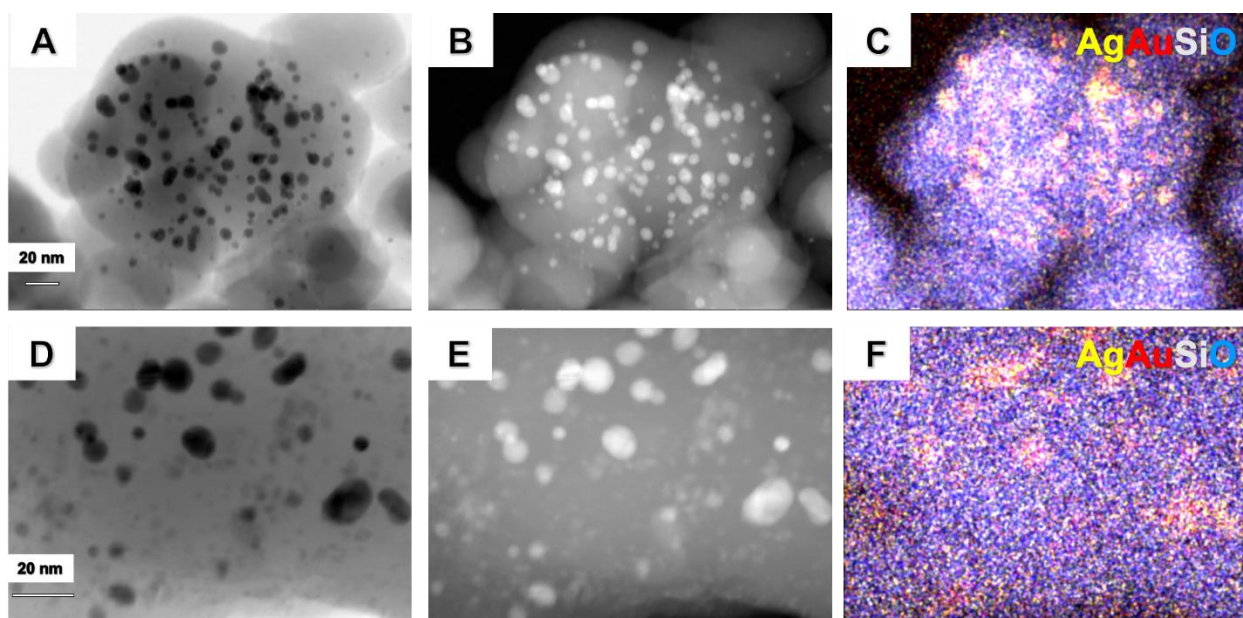

**Supplementary Figure S2** – HAADF-STEM and STEM-EDX characterization of the bimetallic materials. AgAu/SiO<sub>2</sub> galvanic (**A-C**), AgAu/SiO<sub>2</sub> one-pot (**D-F**).

**Supplementary Table S1 - ICP-OES analysis**

| Sample                         | Total metal in sample (mass %) | Ag (mass %) | Au (mass %) |
|--------------------------------|--------------------------------|-------------|-------------|
| Ag/SiO <sub>2</sub>            | 2.50                           | 100         | -           |
| Au/SiO <sub>2</sub>            | 2.84                           | -           | 100         |
| AgAu/SiO <sub>2</sub> galvanic | 3.10                           | 58          | 42          |
| AgAu/SiO <sub>2</sub> one-pot  | 2.73                           | 36          | 64          |

**Supplementary Table S2 – Reaction yield for 1h-milling calculated from ICP-OES and metal salt added.**

| <b>Sample</b>                     | <b>Initial<br/>amount of Ag<br/>(mass %)</b> | <b>Initial<br/>amount of<br/>Au (mass %)</b> | <b>Obtained<br/>amount of<br/>Ag (mass %)</b> | <b>Obtained<br/>amount of Au<br/>(mass %)</b> | <b>Yield<br/>Ag<br/>(%)</b> | <b>Yield<br/>Au<br/>(%)</b> |
|-----------------------------------|----------------------------------------------|----------------------------------------------|-----------------------------------------------|-----------------------------------------------|-----------------------------|-----------------------------|
| Ag/SiO <sub>2</sub>               | 4.41                                         | -                                            | 2.50                                          | -                                             | 56.7                        | -                           |
| Au/SiO <sub>2</sub>               | -                                            | 4.60                                         | -                                             | 2.84                                          | -                           | 61.7                        |
| AgAu/SiO <sub>2</sub><br>galvanic | 2.50                                         | 1.60                                         | 1.80                                          | 1.29                                          | 72.0                        | 80.6                        |
| AgAu/SiO <sub>2</sub><br>one-pot  | 2.11                                         | 2.34                                         | 0.99                                          | 1.75                                          | 46.9                        | 74.8                        |

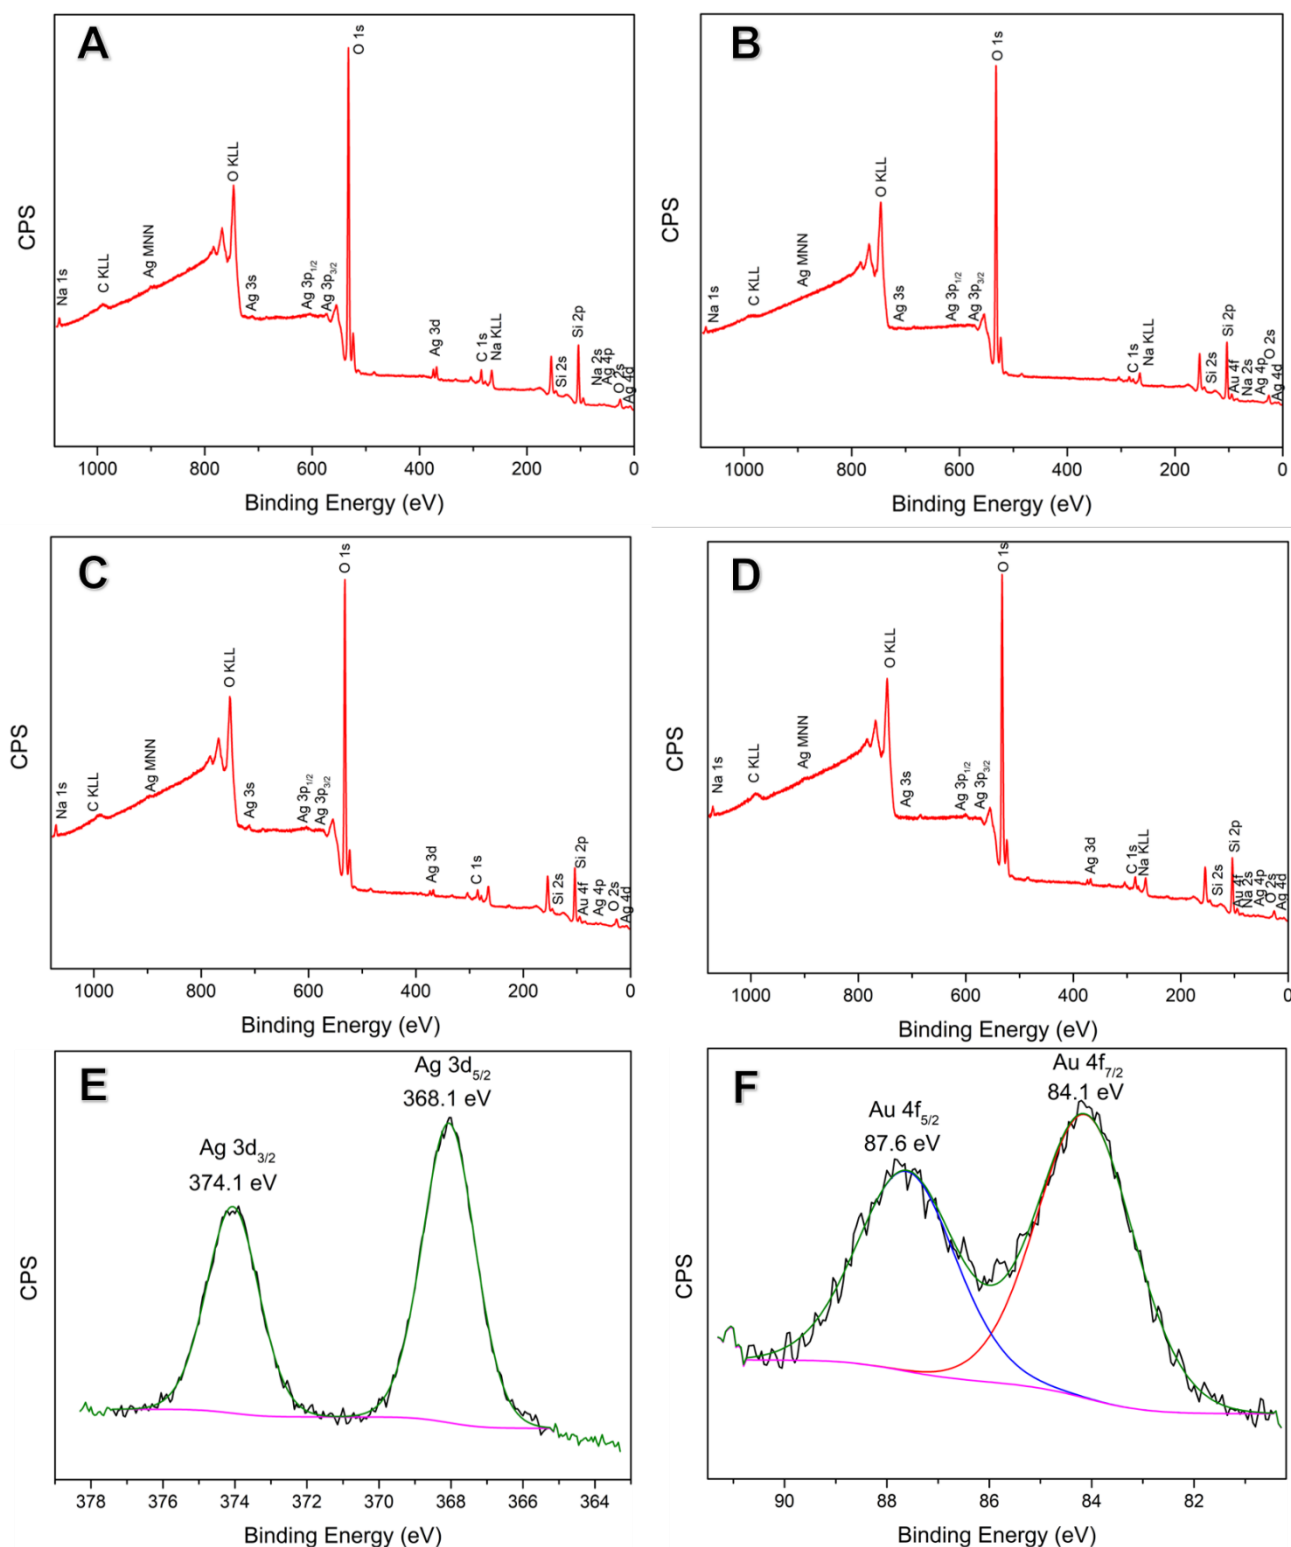

**Supplementary Figure S3** - XPS spectra of the mechanochemically prepared samples. Survey spectra of Ag/SiO<sub>2</sub> (A), Au/SiO<sub>2</sub> (B), AgAu/SiO<sub>2</sub> Galvanic (C), AgAu/SiO<sub>2</sub> one-pot (D). HR-XPS for Ag 3d of Ag/SiO<sub>2</sub> (E) and Au 4f of Au/SiO<sub>2</sub> (F) regions.

**Supplementary Table S3 – XPS elemental analysis**

| <b>Sample</b>                  | <b>Ag (mass %)</b> | <b>Au (mass %)</b> |
|--------------------------------|--------------------|--------------------|
| Ag/SiO <sub>2</sub>            | 100                | -                  |
| Au/SiO <sub>2</sub>            | -                  | 100                |
| AgAu/SiO <sub>2</sub> galvanic | 62                 | 38                 |
| AgAu/SiO <sub>2</sub> one-pot  | 62                 | 38                 |

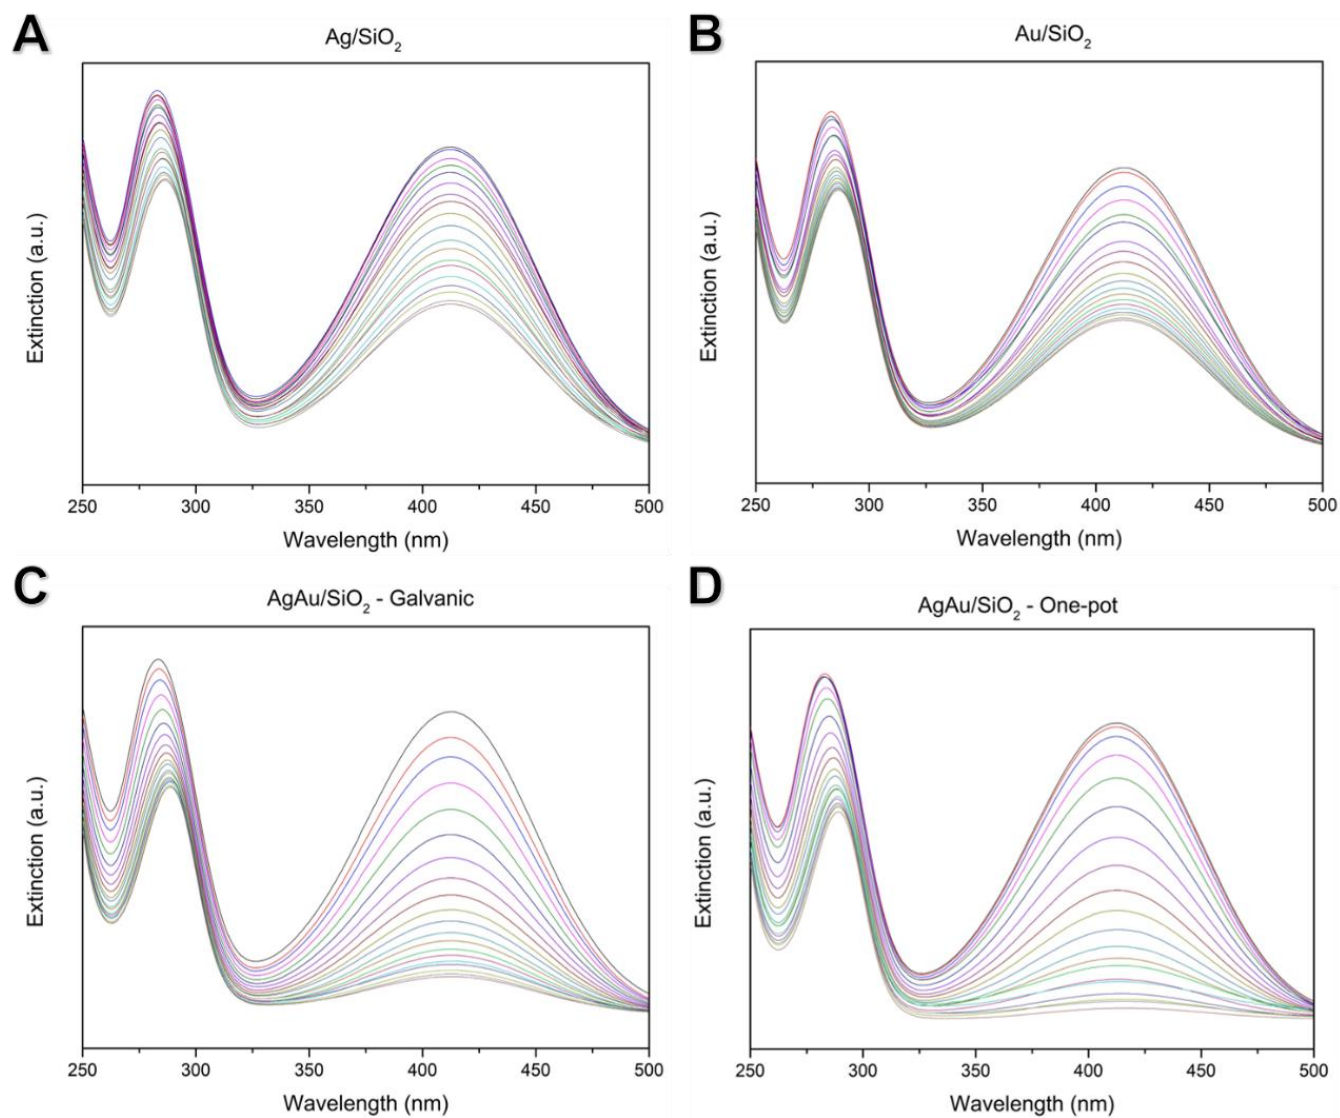

**Supplementary Figure S4** – Catalytic reduction of 2-NA to o-PDA with NaBH<sub>4</sub> catalyzed by Ag/SiO<sub>2</sub> (A), Au/SiO<sub>2</sub> (B), AgAu/SiO<sub>2</sub> galvanic (C) and AgAu/SiO<sub>2</sub> one-pot (D).



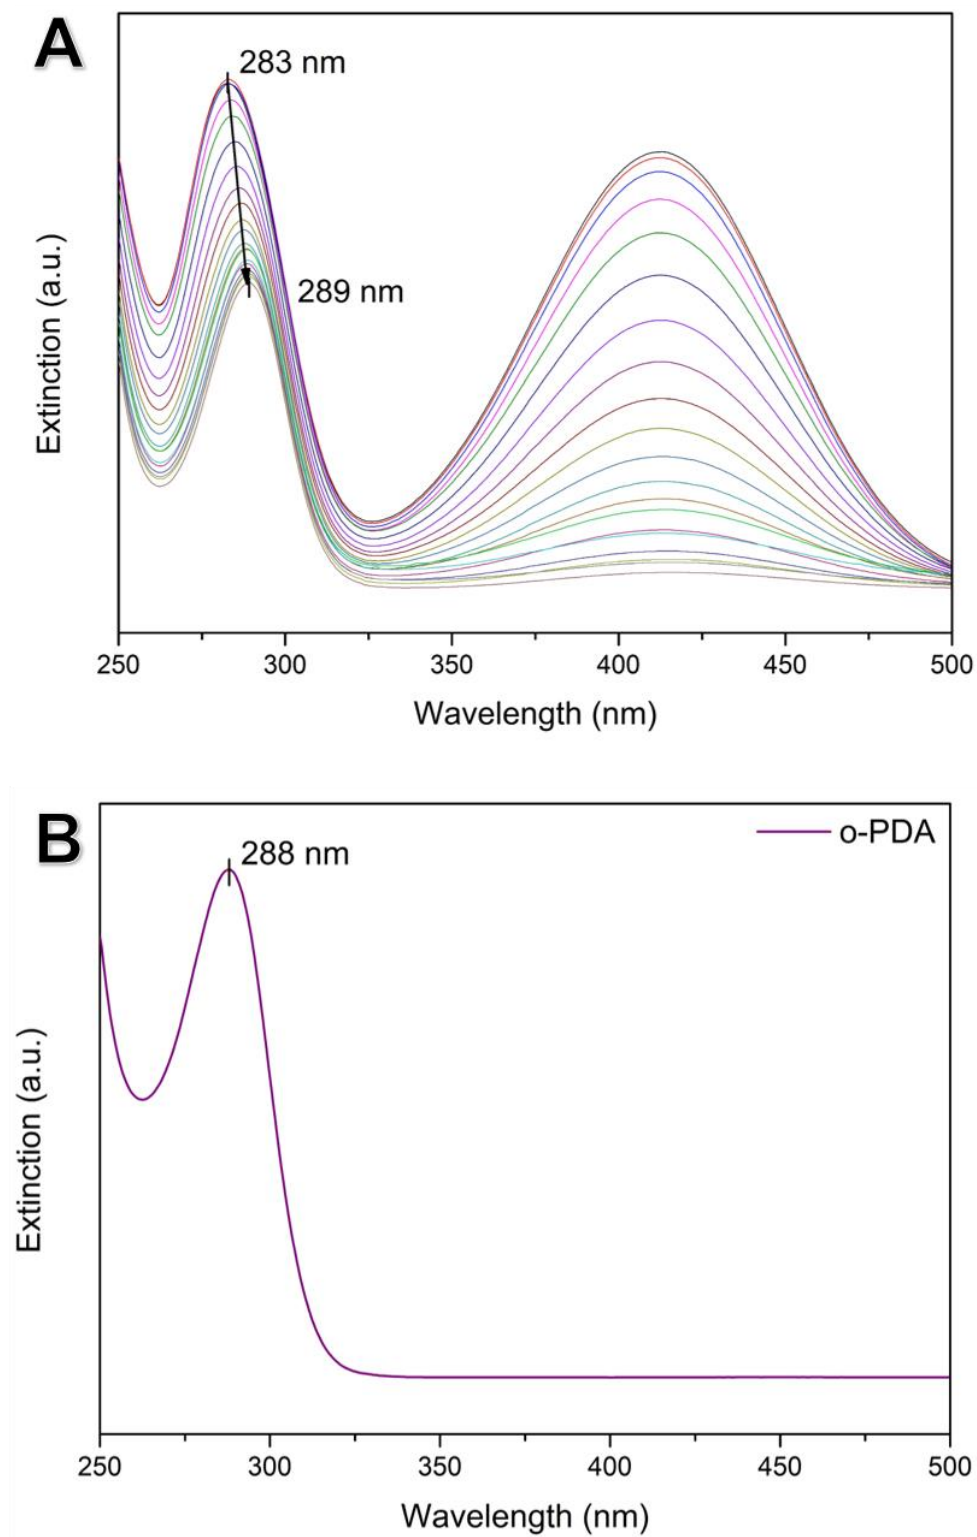

**Supplementary Figure S5** – Band shift in the range of 280 nm throughout the catalytic reduction of 2-NA (**A**) represents the formation of o-PDA (**B**).
